# Supplementary material for: Association of fall rate and functional status by APOE genotype in cancer survivors after exercise intervention
Source: PubMed Central journal article supplement (PMC11623406; doi:10.18632/oncotarget.28310), 2022-11-17
Supplement: oncotarget-13-28310-s001.pdf [file oncotarget-13-28310-s001.pdf]

## Association of fall rate and functional status by *APOE* genotype in cancer survivors after exercise intervention

### SUPPLEMENTARY MATERIALS

**Supplementary Table 1: *APOE* allele frequencies compared to reference<sup>1</sup>**

| <i>APOE</i> Allele | Frequency ( <i>n</i> ) | Reference frequency | <i>p</i> |
|--------------------|------------------------|---------------------|----------|
| ε2                 | 6.7% (17)              | 5.3%                | 0.477    |
| ε3                 | 81.7% (206)            | 79.8%               |          |
| ε4                 | 11.5% (29)             | 14.9%               |          |

<sup>1</sup>Data from: Johnson LA, Zuloaga DG, Bidiman E, Marzulla T, Weber S, Wahbeh H, Raber J. apoE2 exaggerates PTSD-related behavioral, cognitive, and neuroendocrine alterations. *Neuropsychopharmacology*. 2015; 40:2443–53.
